### Association of baseline hemoglobin A1c levels with bleeding in patients with non-ST-segment elevation acute coronary syndrome underwent percutaneous coronary intervention

H.L. Fan<sup>1</sup>, Y.H. Liu<sup>2</sup>, P.Y. Chen<sup>3</sup>, L. Jiang<sup>2</sup>, X.B. Wei<sup>2</sup>, W. Guo<sup>2</sup>, L.H. Zeng<sup>4</sup>, N. Tan<sup>2</sup>, J.Y. Chen<sup>2</sup>, P.C. He<sup>2</sup>

<sup>1</sup>School of Medicine, South China University of Technology, Guangzhou, China; <sup>2</sup>Guangdong Cardiovascular Institute, Guangdong Provincial People's Hospital, Department of Cardiology, Guangzhou, China; <sup>3</sup>Guangdong Provincial People's Hospital's Nanhai Hospital, Department of Cardiology, Guangzhou, China; <sup>4</sup>The Second School of Clinical Medicine, Southern Medical University, Guangzhou, China

**Funding Acknowledgement:** Type of funding source: Other. Main funding source(s): Science and Technology Planning Project of Guangzhou City (201707010002)

**Background:** The association between baseline hemoglobin A1c (HbA1c) levels before the percutaneous coronary intervention and bleeding is unclear in patients with non-ST-segment elevation acute coronary syndrome.

**Purpose:** To investigate the association between baseline HbA1c levels before the percutaneous coronary intervention and bleeding in patients with non-ST-segment elevation acute coronary syndrome.

**Methods:** This observational cohort study enrolled 6,283 consecutive patients with non-ST-segment elevation acute coronary syndrome, from 1 January 2010 to 31 December 2014. Based on baseline HbA1c levels, the patients were divided into the HbA1c <7% group (n=4,740) and the HbA1c ≥7% group (n=1,543). The primary outcomes are major bleeding events (BARC grades 3–5) and all-cause death during follow-up.

**Results:** Of the patients who were enrolled, 4,705 (74.9%) were male and

2,143 (34.1%) had a history of diabetes mellitus, with a mean (SD) age of 64.13 (10.32) years. Median follow-up duration was 3.21 years. Compared with HbA1c <7% patients, the risk of major bleeding events and all-cause was both higher in HbA1c ≥7% patients (major bleeding: adjusted hazard ratio, 1.62; 95% confidence interval, 1.04–2.53; P=0.032; all-cause death: adjusted hazard ratio, 1.26; 95% confidence interval, 1.03–1.55; P=0.027). The result of the subgroups analyses was consistent with the primary analyses.

**Conclusions:** Higher baseline HbA1c levels before percutaneous coronary intervention was associated with an increase in bleeding risk in non-ST-elevation acute coronary syndrome patients. This study suggests that the HbA1c levels should be taken into account for the prolonged antithrombotic strategies of non-ST-elevation acute coronary syndrome patients.

Multivariable analyses for outcomes

| Outcomes                          | Univariate analysis  |                         |         | Multivariate analysis |                         |         |
|-----------------------------------|----------------------|-------------------------|---------|-----------------------|-------------------------|---------|
|                                   | Odds or Hazard ratio | 95% Confidence interval | P value | Odds or Hazard ratio  | 95% Confidence interval | P value |
| <b>In-hospital</b>                |                      |                         |         |                       |                         |         |
| All-cause death                   | 0.28                 | 0.04–2.16               | 0.222   | 0.19                  | 0.02–1.49               | 0.114   |
| Major bleeding (BARC grades 3–5)  | 1.53                 | 1.02–2.29               | 0.040   | 1.42                  | 0.81–2.49               | 0.220   |
| Any bleeding (BARC grades 1–5)    | 0.93                 | 0.78–1.10               | 0.389   | 0.86                  | 0.68–1.09               | 0.207   |
| <b>Follow up</b>                  |                      |                         |         |                       |                         |         |
| All-cause death                   | 1.34                 | 1.09–1.64               | 0.006   | 1.26                  | 1.03–1.55               | 0.027   |
| Major bleeding (BARC grades 3–5)  | 1.61                 | 1.17–2.22               | 0.004   | 1.62                  | 1.04–2.53               | 0.032   |
| Any bleeding (BARC grades 1–5)    | 0.98                 | 0.86–1.12               | 0.772   | 1.02                  | 0.86–1.21               | 0.831   |
| All-cause death or Major bleeding | 1.39                 | 1.17–1.66               | <0.001  | 1.13                  | 0.89–1.42               | 0.308   |

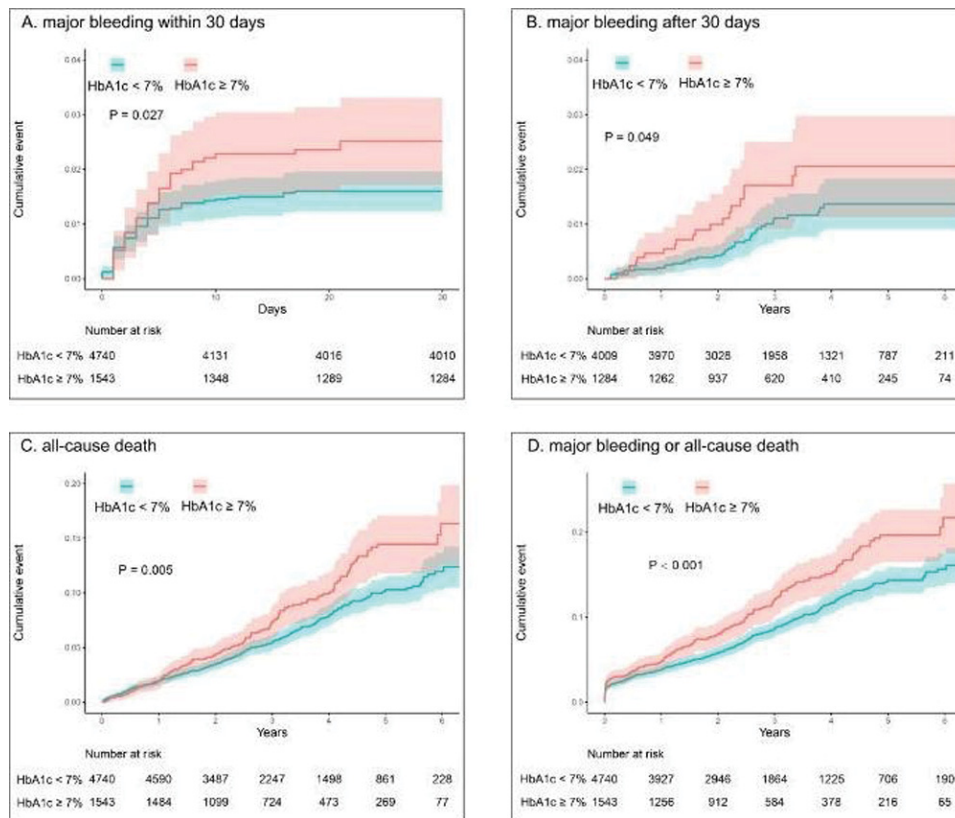

Figure 1. Kaplan-Meier Analysis for Outcomes
